# Supplementary material for: A coordination polymer precursor approach to the synthesis of NiFe bimetallic nanoparticles within hybrid mesoporous silica
Source: Royal Society of Chemistry journal article supplement (doi:10.1039/b608058h), 2006-01-01
Supplement: b608058h.pdf [file b608058h.pdf]

## Supplementary Materials

### A New Coordination Polymer Precursor Approach to the Synthesis of NiFe Bimetallic Nanoparticles within Hybrid Mesoporous Silica

**Benjamin Folch,<sup>a</sup> Joulia Larionova,<sup>a\*</sup> Yannick Guari,<sup>a\*</sup> Lucien Datas<sup>b</sup> and Christian Guérin<sup>a</sup>**

<sup>a</sup> *Laboratoire de Chimie Moléculaire et Organisation du Solide (LCMOS), UMR 5637, Université Montpellier II, Place E. Bataillon, 34095 Montpellier cedex 5, France. Fax: (33) 4 67 14 38 52, e-mail: [joulia@univ-montp2.fr](mailto:joulia@univ-montp2.fr); [guari@univ-montp2.fr](mailto:guari@univ-montp2.fr).*

<sup>b</sup> *Service Commun de Microscopie Electronique TEMSCAN, Université Paul Sabatier, 118 route de Narbonne 31062 Toulouse Cedex 4, France.*

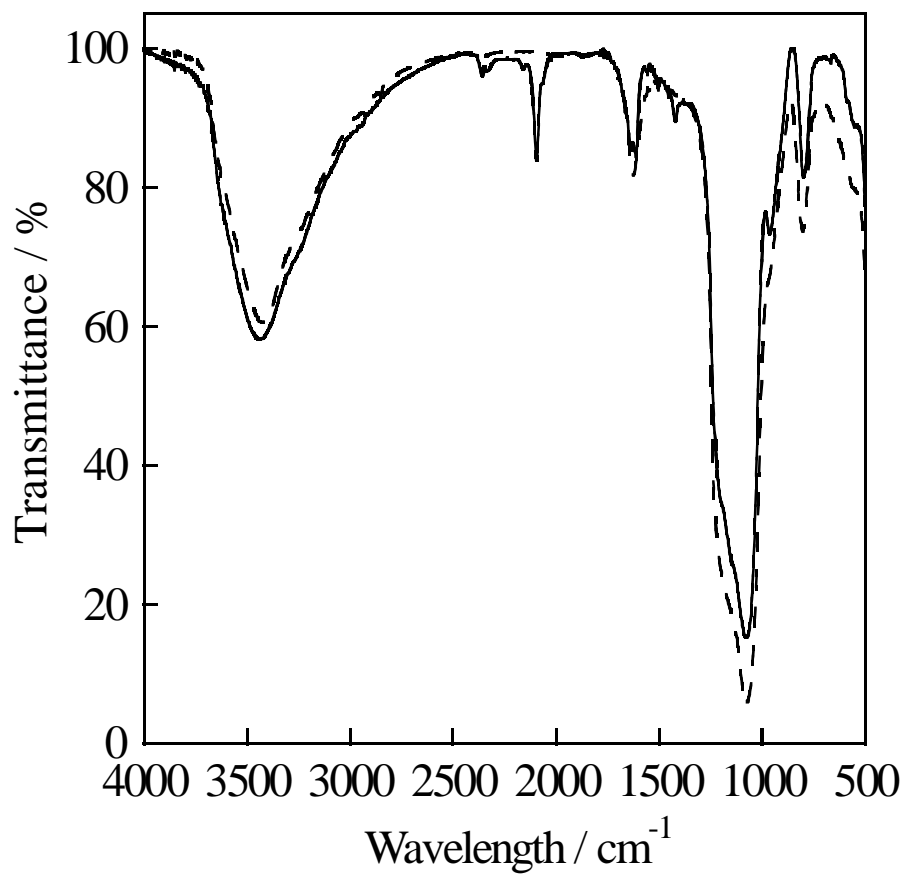

**Figure 1S.** Infrared spectra of **2a** (solid line) and **3a** (dashed line).

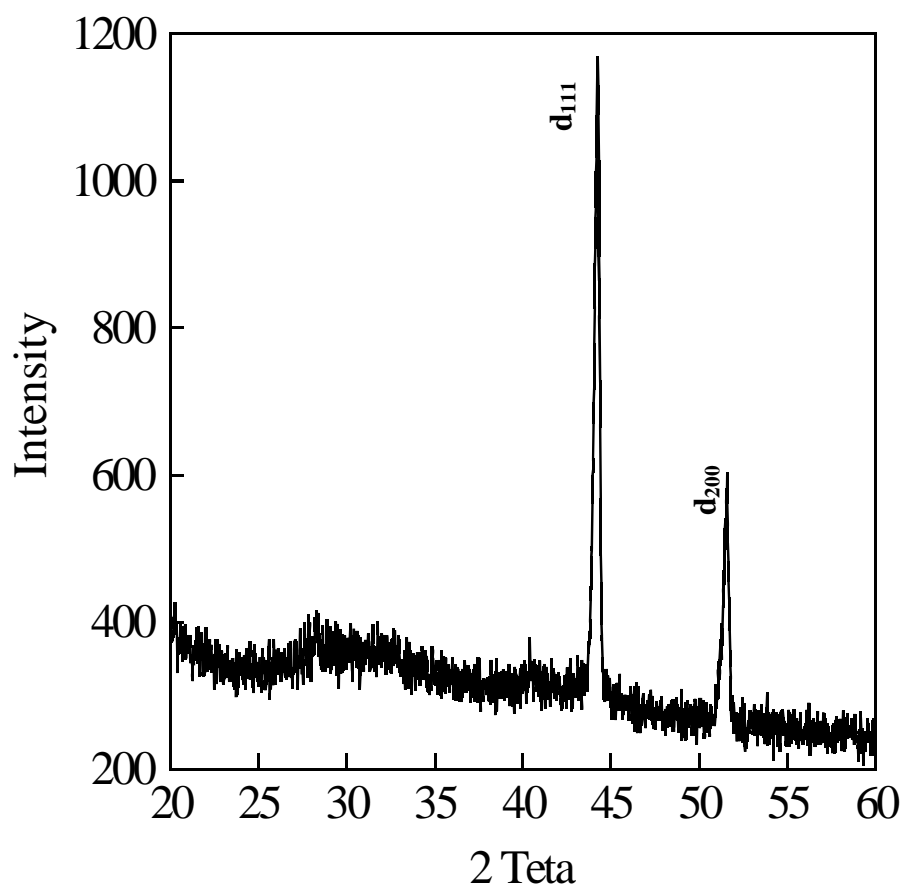

**Figure 2S.** Powder X-Ray diffraction pattern within the range of  $2\theta$  ( $20 - 60^\circ$ ) for the sample obtained by calcinations of  $\text{Ni}_3[\text{Fe}(\text{CN})_6]_2$  at  $700^\circ\text{C}$  under argon atmosphere.

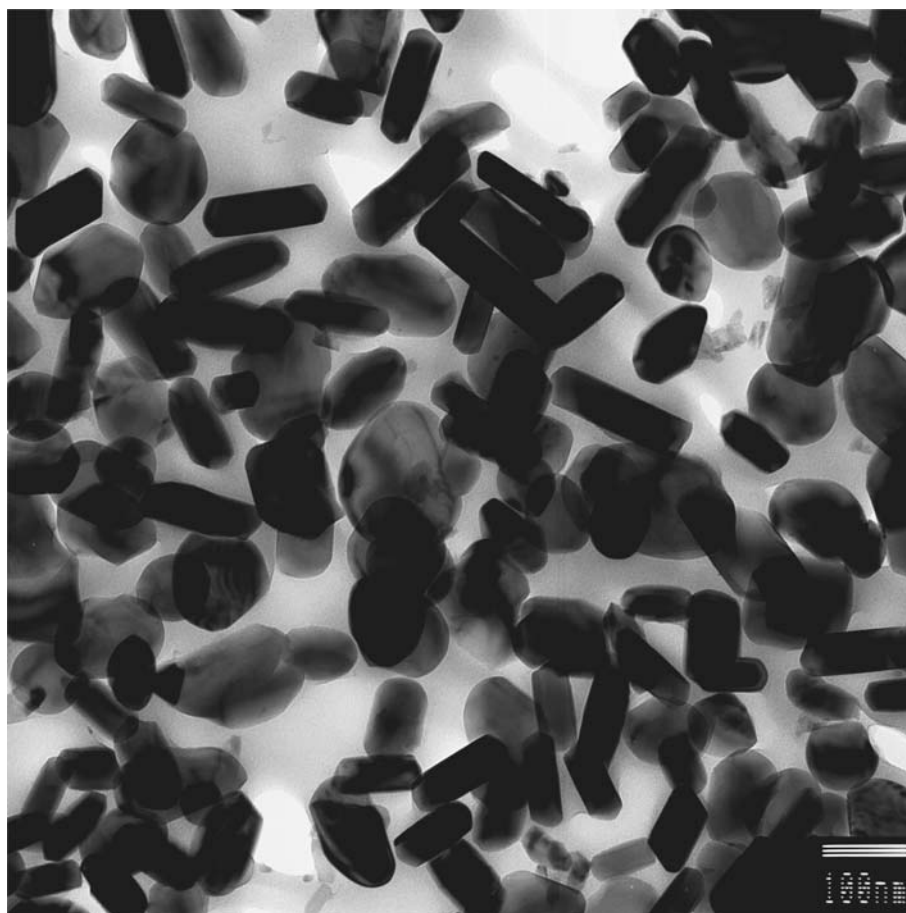

**Figure 3S.** TEM micrograph for the sample obtained by calcinations of  $\text{Ni}_3[\text{Fe}(\text{CN})_6]_2$  at 700 °C under argon atmosphere.

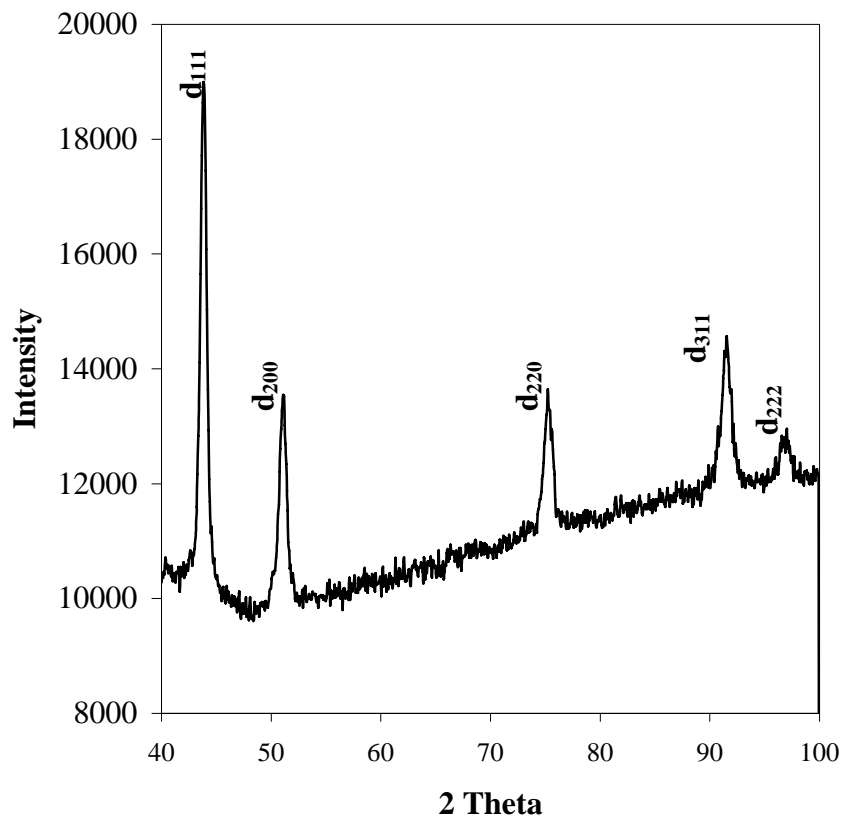

**Figure 4S.** Powder X-Ray diffraction pattern within the range of  $2\theta$  ( $40 - 100^\circ$ ) for the sample obtained by calcinations of  $\text{Ni}_3[\text{Fe}(\text{CN})_6]_2$  at  $400^\circ\text{C}$  under hydrogen atmosphere.

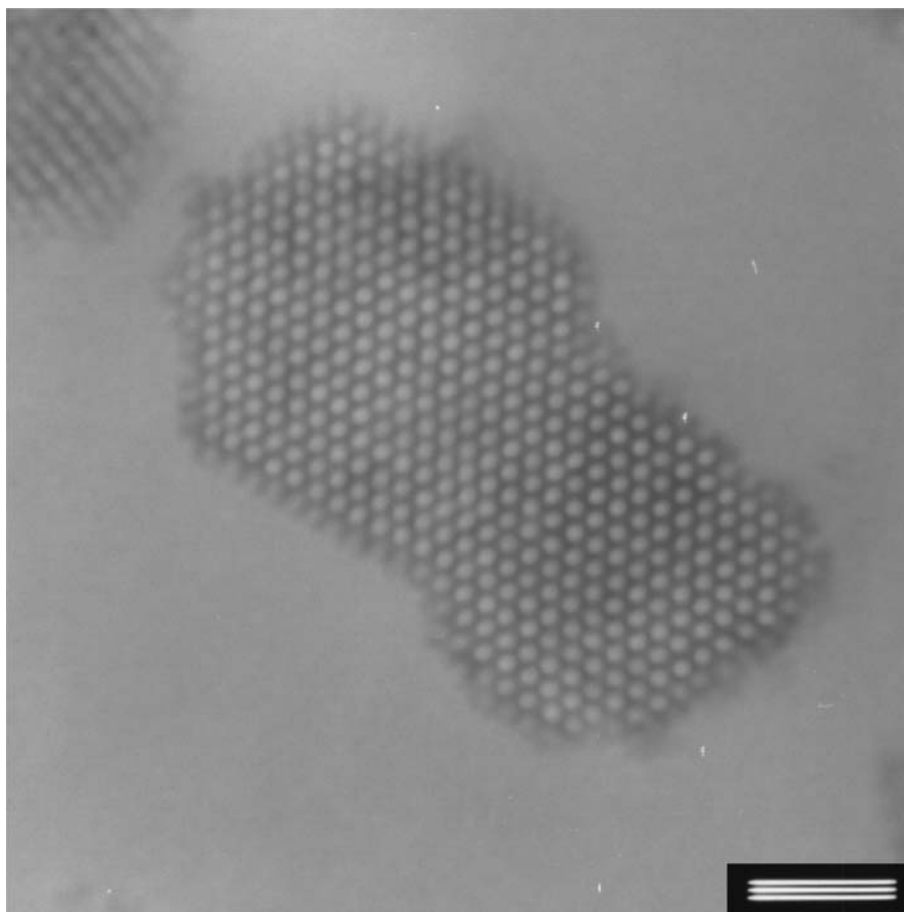

**Figure 5S.** TEM image of **1a**. Scale bar = 50 nm.

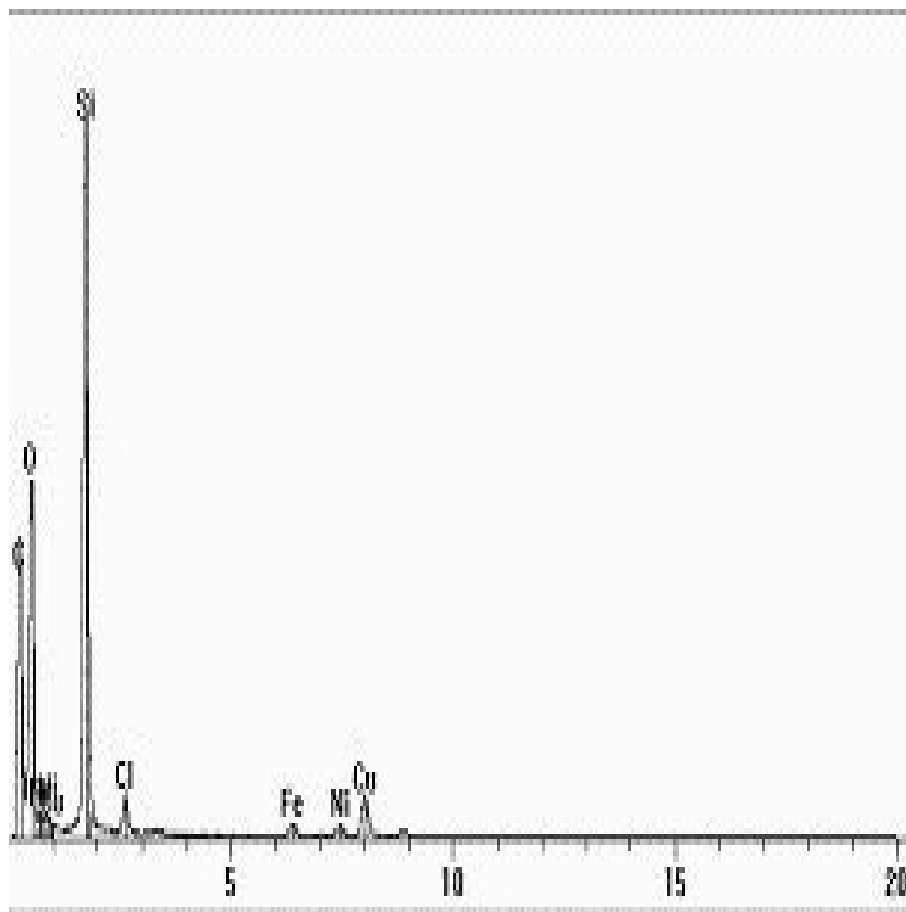

**Figure 6S.** EDAX measurement performed on one NiFe nanoparticle within nanocomposite  
**3a.**
